# Supplementary material
Source: HighWire-hosted journal article supplement (https://jnm.snmjournals.org/highwire/filestream/94470/field_highwire_adjunct_files/0/113183_Supplemental_Data.pdf)
Supplement: 113183_Supplemental_Data.pdf [file 113183_Supplemental_Data.pdf]

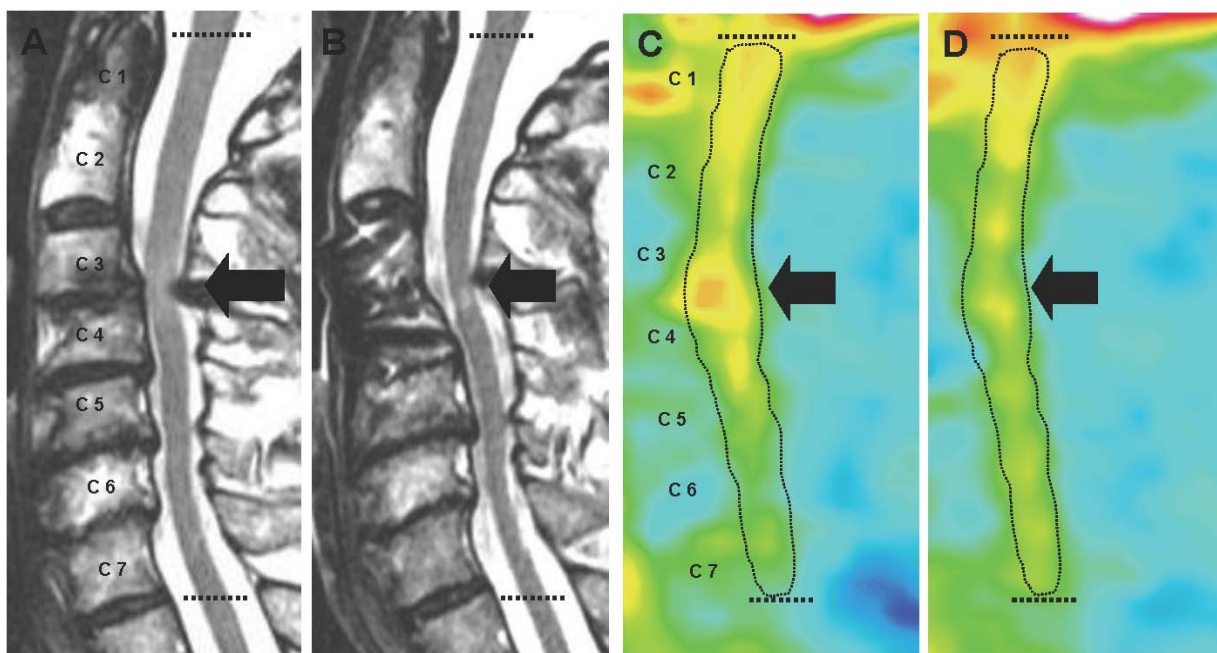

**Supplemental Figure 1:** Patient with myelopathy type 1 (patient #4). The T2-weighted MRI (A) shows a stenosis with compression of the cervical spinal cord and an intramedullary hyperintensity at the level C3/4 (arrow). The corresponding  $^{18}\text{F}$ -FDG PET (C) shows an increased  $^{18}\text{F}$ -FDG uptake at the level of stenosis at C3/4 (arrow). The dotted line indicates the position of the spinal canal. Postoperatively, symptoms of cervical myelopathy improved considerably (increase of JOA score, 6 points). One year after decompressive surgery, MR imaging shows the re-established flow of cerebrospinal fluid around the cervical spinal cord and the intramedullary hyperintensity at the level of the former stenosis at C3/4 (arrow) is unchanged (B). In contrast, corresponding  $^{18}\text{F}$ -FDG PET (D) indicates a complete decline of  $^{18}\text{F}$ -FDG uptake at the level of the former stenosis at C3/4 (arrow).

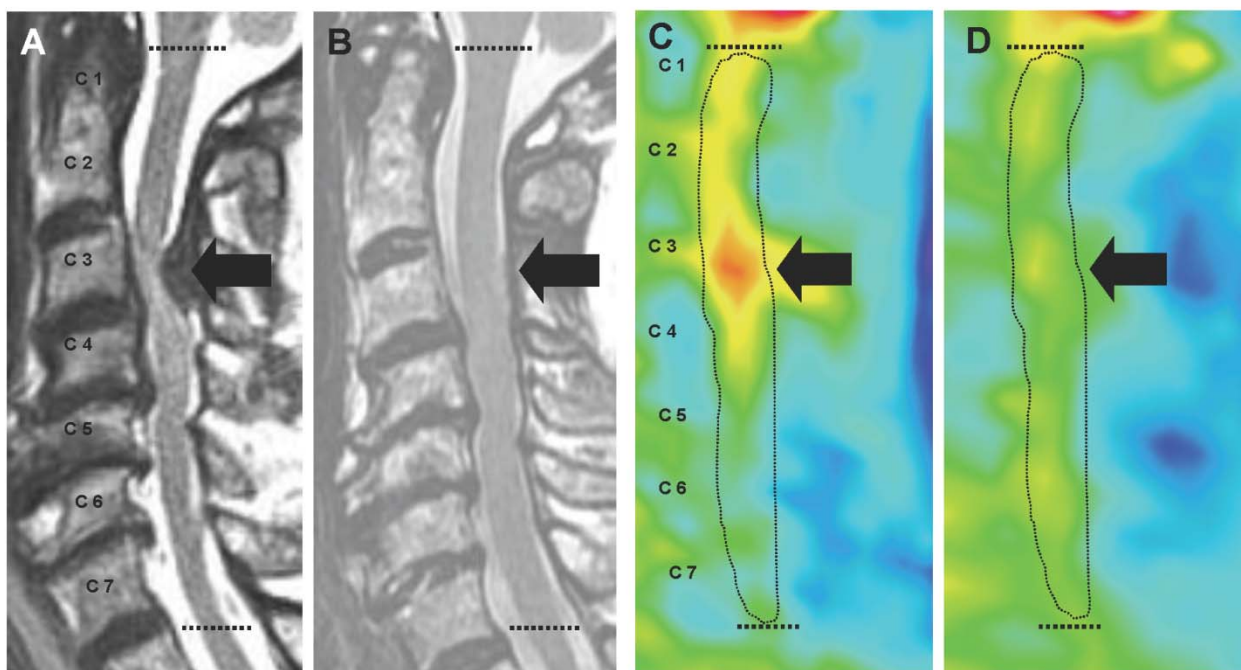

**Supplemental Figure 2:** Patient with myelopathy type 1 (patient #6). The T2-weighted MRI (A) shows a stenosis with compression of the cervical spinal cord and a diffuse intramedullary hyperintensity at the level C3/4 (arrow). The corresponding  $^{18}\text{F}$ -FDG PET (C) shows an increased  $^{18}\text{F}$ -FDG uptake at the level of stenosis at C3/4 (arrow). The dotted line indicates the position of the spinal canal. Postoperatively, symptoms of cervical myelopathy improved considerably (increase of JOA score, 7 points). One year after decompressive surgery, MR imaging shows no compression of the cervical spinal cord and the intramedullary hyperintensity at the level of the former stenosis at C3/4 (arrow) is vanished (B). The corresponding  $^{18}\text{F}$ -FDG PET (D) indicates a complete decline of  $^{18}\text{F}$ -FDG uptake at the level of the former stenosis at C3/4 (arrow).
